# Supplementary material for: Abiotic Stresses Antagonize the Rice Defence Pathway through the Tyrosine-Dephosphorylation of OsMPK6
Source: PLoS Pathog. 2015 Oct 20;11(10):e1005231. doi: 10.1371/journal.ppat.1005231 (PMC4617645; doi:10.1371/journal.ppat.1005231)
Supplement: S1 Table — (XLSX) [file ppat.1005231.s001.xlsx]

## Sheet: Sheet1
S1 Table
Primer sequences used for qPCR
Name	Sequence (5' to 3')	gene
Blast1	TACGAGAGGAACCGCTCATTCAGATAATTA	28S rDNA of M.g
Blast2	TCAGCAGATCGTAACGATAAAGCTACTC
W62kdRT1F	ACCCCTACCCTAGAGCTTACTTCC	WRKY62
W62kdRT1R	GACCTATCCTCCGCACATCTTT
W45RTF4	CGGGTAAAACGATCGAAAGA	WRKY45
W45RTR4	TTTCGAAAGCGGAAGAACAG
Rubiq1 RT F1	GGAGCTGCTGCTGTTCTAGG	Ubiquitin
Rubiq1 RT R1	TTCAGACACCATCAAACCAGA
u193-PTP1real	CAACGTGAAGCGTATGGAAA	OsPTP1
u194-PTP1real	AATGAACCCTGCTTGACTCG
u195-PTP2real	AAGTTCGCCATGTTCTCCAC	OsPTP2
u196-PTP2real	CCTGCACTGCAATGTGCTAC
Salt-rtF	CGAAATAATGTTCCATGGTGTT	SalT
Salt-rtR	TGTACTACGGATCGGTGCAA
NPR1-UTRT-F1	TCCTCCTGGAGCTACTCACC	OsNPR1
NPR1-UTRT-R1	TCTGCGTTTCACAATTGACG
T3A 2+	TTATGGCATTGGAAAAGCTG	OsMKK10-2 transgene
T3A 2-	ACATAACCAAAGAGAGGTGA
